# Supplementary figures and images for: Cardiac Imaging Using Clinical 1.5 T MRI Scanners in a Murine Ischemia/Reperfusion Model
Source: Hindawi journal article supplement (doi:10.1155/2011/185683), 2010-12-05

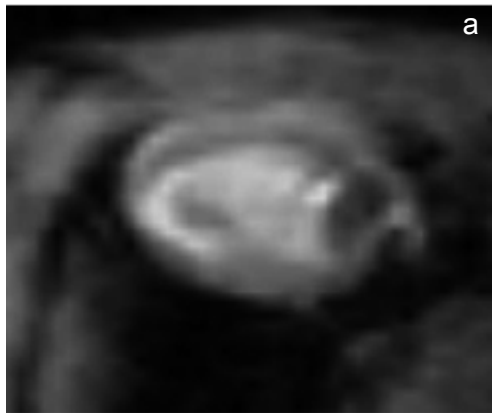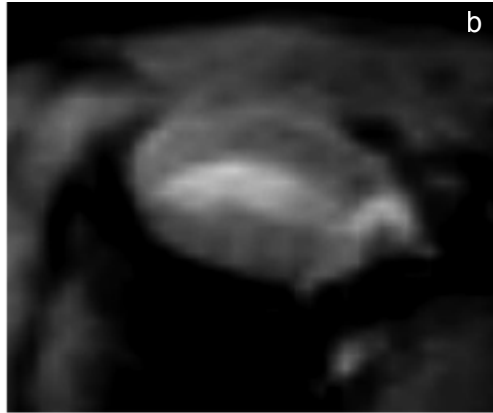

4mm

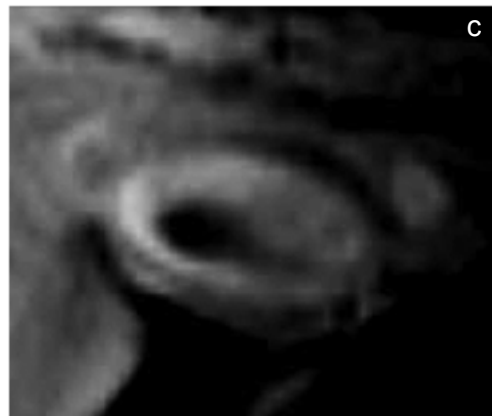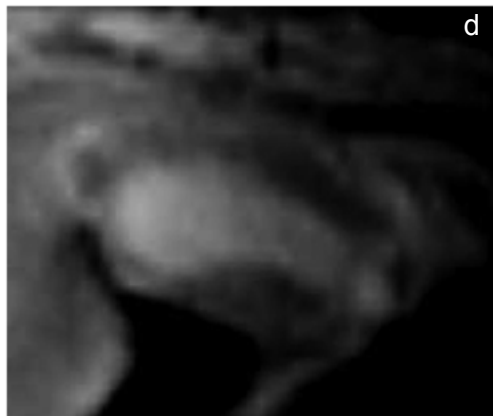

4mm

Supplement: f3 [file 185683.f3.pdf]

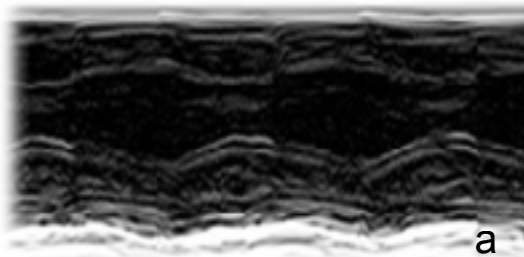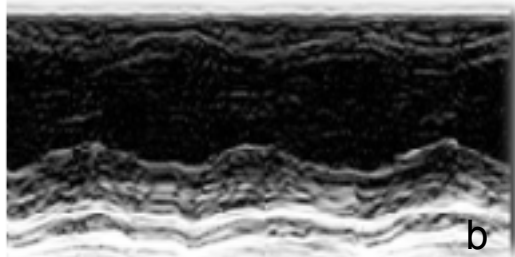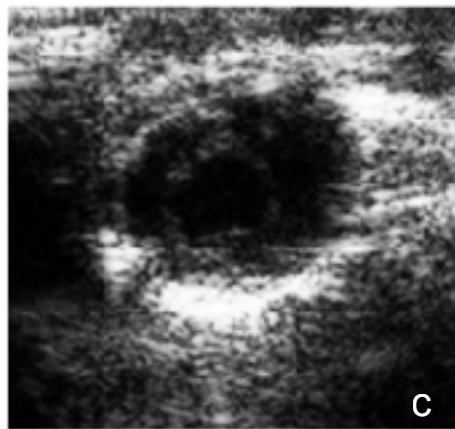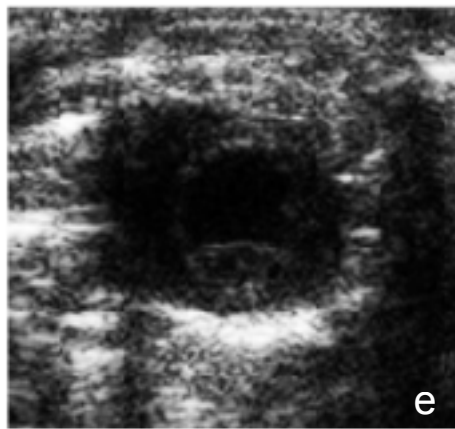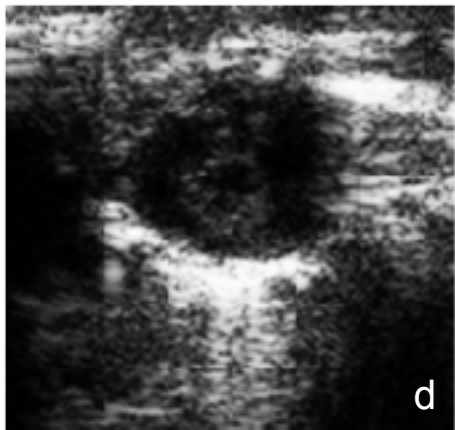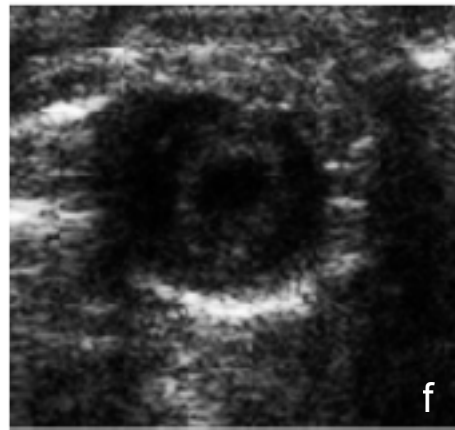

5mm



Supplement: f7 [file 185683.f7.pdf]

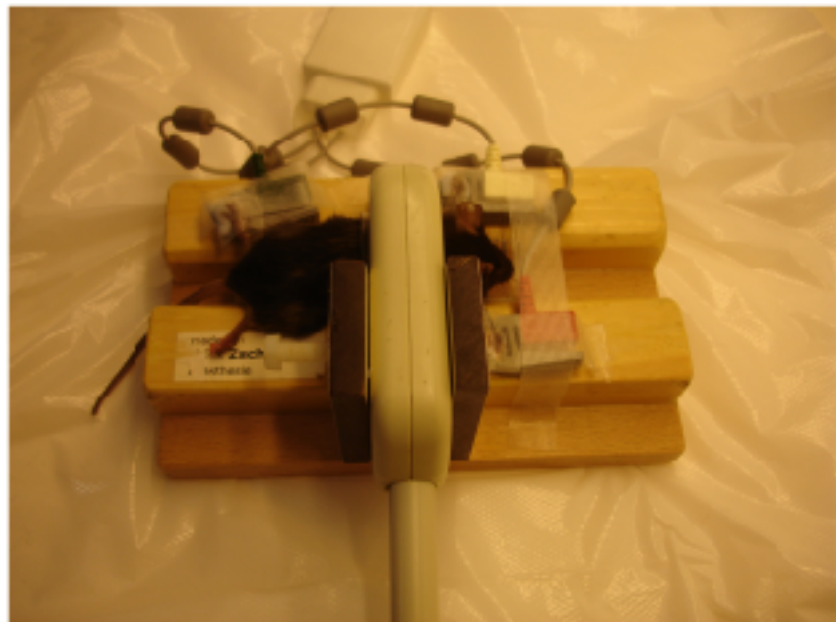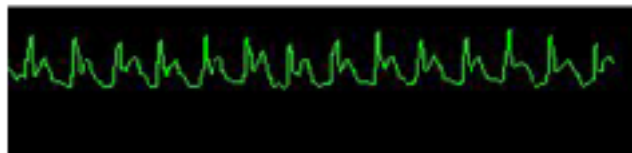

Supplement: f1 [file 185683.f1.pdf]

a

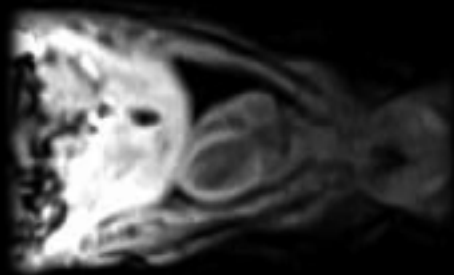

b

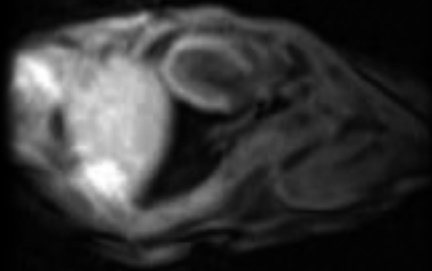

c

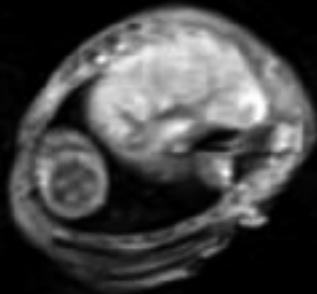

Supplement: f2 [file 185683.f2.pdf]

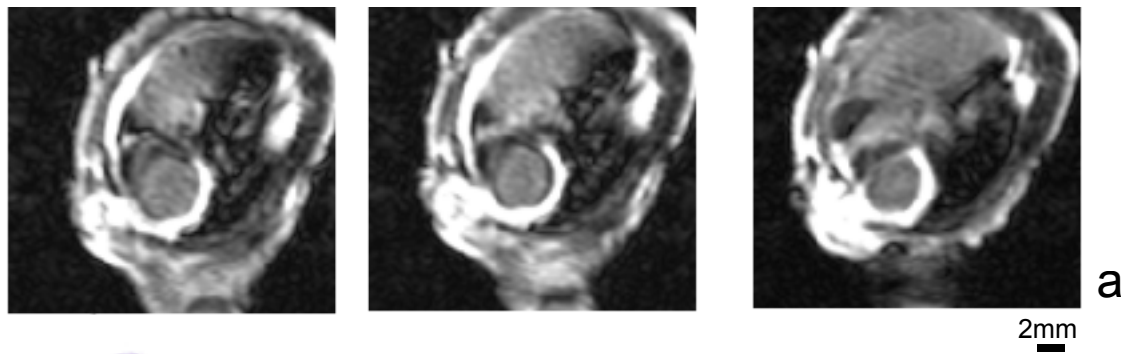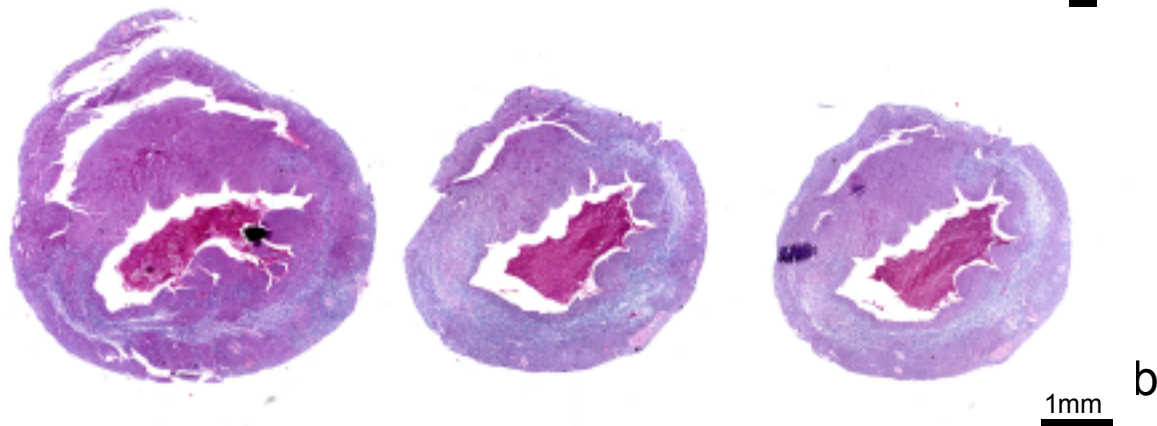

Supplement: f6 [file 185683.f6.pdf]
